# Supplementary material for: Transcriptome Analysis of CYP450 Family Members in Fritillaria cirrhosa D. Don and Profiling of Key CYP450s Related to Isosteroidal Alkaloid Biosynthesis
Source: MDPI journal article supplement (doi:10.3390/genes14010219), 2023-01-14
Supplement: s1 [file s1]

Table S5. Method validation results and content of 3 components in F.cirrhosa (n=3, mean±SD)

| Constituent | Regression equation    | Correlation coefficient (R <sup>2</sup> ) | Linearity range (µg/mL) | Content (%)  |              |
|-------------|------------------------|-------------------------------------------|-------------------------|--------------|--------------|
|             |                        |                                           |                         | 1-year       | 3-year       |
| Imperialine | $y = 0.9995x + 2.8054$ | 0.9993                                    | 26.2 ~ 420.0            | 0.0132±0.014 | 0.0621±0.017 |
| Peimine     | $y = 1.0275x + 2.5424$ | 0.9993                                    | 25.8 ~ 413.0            | 0.0082±0.007 | 0.0482±0.015 |
| Peininine   | $y = 0.9687x + 2.7215$ | 0.9995                                    | 25.4 ~ 406.0            | 0.0014±0.012 | 0.0061±0.014 |
