# Supplementary material for: Transcriptome Analysis of CYP450 Family Members in Fritillaria cirrhosa D. Don and Profiling of Key CYP450s Related to Isosteroidal Alkaloid Biosynthesis
Source: MDPI journal article supplement (doi:10.3390/genes14010219), 2023-01-14
Supplement: s1 [file s1]

**Table S4.** A list of 47 previously reported plant CYP450s involved in steroid biosynthesis.

| <b>Name On Tree</b> | <b>Species Name</b>              | <b>Accession Number</b> | <b>Function</b>                         |
|---------------------|----------------------------------|-------------------------|-----------------------------------------|
| <b>SICYP90B3</b>    | <i>Solanum lycopersicum</i>      | NM_001279330.2          | Steroid C22 hydroxylation               |
| <b>TfCYP90B51</b>   | <i>Trigonella foenum-graecum</i> | MK636706.1              | Steroid C22S/ C22R hydroxylation        |
| <b>AtCYP90B1</b>    | <i>Arabidopsis thaliana</i>      | AF412114                | Steroid C22 hydroxylation               |
| <b>OsCYP90B2</b>    | <i>Oryza sativa</i>              | AB206579.1              | Steroid C22 hydroxylation               |
| <b>PpCYP90B52</b>   | <i>Paris polyphylla</i>          | MK636701.1              | Cholesterol C22S hydroxylation          |
| <b>TfCYP90B50</b>   | <i>Trigonella foenum-graecum</i> | MK636707.1              | Cholesterol C22R, C16 dihydroxylation   |
| <b>VcCYP90B27</b>   | <i>Veratrum californicum</i>     | KJ869252                | Cholesterol C22 hydroxylation           |
| <b>PpCYP90B27</b>   | <i>Paris polyphylla</i>          | KX904822                | Cholesterol C22 hydroxylation           |
| <b>DzCYP90B71</b>   | <i>Dioscorea Zingi-berensis</i>  | MN829441.1              | Cholesterol C22R hydroxylation          |
| <b>PpCYP90G4</b>    | <i>Paris polyphylla</i>          | MK636702.1              | Steroid C16 oxidation                   |
| <b>DzCYP90G6</b>    | <i>Dioscorea Zingi-berensis</i>  | MN829442.1              | Steroid C16 oxidation                   |
| <b>VcCYP90G1v2</b>  | <i>Veratrum californicum</i>     | AJT59567.1              | Steroid C22 hydroxylation               |
| <b>VcCYP90G1v1</b>  | <i>Veratrum californicum</i>     | AJT59564.1              | Steroid C22 hydroxylation               |
| <b>VcCYP90G1v3</b>  | <i>Veratrum californicum</i>     | AJT59566.1              | Steroid C22 hydroxylation               |
| <b>AtCYP724A1</b>   | <i>Arabidopsis thaliana</i>      | NM_001343334.1          | Brassinosteroids C22 hydroxylation      |
| <b>OsCYP724B1</b>   | <i>Oryza sativa</i>              | NM_001059582.1          | Steroid C22 hydroxylation               |
| <b>SICYP724B2</b>   | <i>Solanum lycopersicum</i>      | NM_001279143.2          | Steroid C22 hydroxylation               |
| <b>OsCYP90A3</b>    | <i>Oryza sativa</i>              | AB206580                | Brassinosteroid C23 hydroxylation       |
| <b>AtCYP90A1</b>    | <i>Arabidopsis thaliana</i>      | AY087526.1              | Brassinosteroid C3 oxidation            |
| <b>SICYP90A5</b>    | <i>Solanum lycopersicum</i>      | XM_004240898            | Steroid C22 hydroxylation               |
| <b>ZeCYP90A11</b>   | <i>Zinnia elegans</i>            | AB231153                | Steroid C23 hydroxylation               |
| <b>AtCYP90C1</b>    | <i>Arabidopsis thaliana</i>      | NM_119801               | Steroid C23 hydroxylation               |
| <b>AtCYP90D1</b>    | <i>Arabidopsis thaliana</i>      | NM_112223.3             | Steroid C23 hydroxylation               |
| <b>OsCYP90D2</b>    | <i>Oryza sativa</i>              | NM_001048832.1          | Steroid C23 hydroxylation               |
| <b>OsCYP90D3</b>    | <i>Oryza sativa</i>              | AAT44310.1              | Steroid C23 hydroxylation               |
| <b>SICYP85A1</b>    | <i>Solanum lycopersicum</i>      | NM_001247334.2          | Steroid C6 oxidation                    |
| <b>AtCYP85A2</b>    | <i>Arabidopsis thaliana</i>      | AB087801.1              | Steroid C6 oxidation                    |
| <b>AtCYP85A1</b>    | <i>Arabidopsis thaliana</i>      | Q9FMA5.1                | Steroid C6 oxidation                    |
| <b>SICYP85A3</b>    | <i>Solanum lycopersicum</i>      | AB190445.1              | Steroid C6 oxidation                    |
| <b>SICYP88B1</b>    | <i>Solanum lycopersicum</i>      | XM_004251512.1          | Steroid C26 oxidation                   |
| <b>SICYP710A11</b>  | <i>Solanum lycopersicum</i>      | NM_001247585.2          | Steroid C22 desaturation                |
| <b>AtCYP710A1</b>   | <i>Arabidopsis thaliana</i>      | AB219423.1              | Steroid C22 desaturation                |
| <b>AtCYP710A2</b>   | <i>Arabidopsis thaliana</i>      | AB233425.1              | Steroid C22 desaturation                |
| <b>AtCYP710A4</b>   | <i>Arabidopsis thaliana</i>      | NM_128444.2             | Steroid C22 desaturation                |
| <b>AtCYP51G1</b>    | <i>Arabidopsis thaliana</i>      | NP_172633.1             | Obtusifoliol C14 $\alpha$ demethylation |

|                    |                                  |                |                                   |
|--------------------|----------------------------------|----------------|-----------------------------------|
| <b>VcCYP94N1v2</b> | <i>Veratrum californicum</i>     | AJT59561.1     | Steroid C26 hydroxylation         |
| <b>PpCYP94D108</b> | <i>Paris polyphylla</i>          | MK636703.1     | Steroid C27 hydroxylation         |
| <b>PpCYP94D109</b> | <i>Paris polyphylla</i>          | MK636704.1     | Steroid C27 hydroxylation         |
| <b>SICYP734A7</b>  | <i>Solanum lycopersicum</i>      | NM_001247011   | Castasterone C26 hydroxylation    |
| <b>AtCYP734A1</b>  | <i>Arabidopsis thaliana</i>      | NM_128228      | Steroid C26 hydroxylation         |
| <b>OsCYP734A2</b>  | <i>Oryza sativa</i>              | AB488666.1     | Brassinosteroids C26 oxidation    |
| <b>AtCYP72C1</b>   | <i>Arabidopsis thaliana</i>      | NM_101566.2    | Brassinosteroid C26 hydroxylation |
| <b>SICYP72A208</b> | <i>Solanum lycopersicum</i>      | NM_001247565.1 | Steroid C22,26 hydroxylation      |
| <b>SICYP72A188</b> | <i>Solanum lycopersicum</i>      | NM_001365979.1 | Steroid C22 oxidation             |
| <b>SICYP72A186</b> | <i>Solanum lycopersicum</i>      | NM_001365978.1 | Cholesterol C22 hydroxylation     |
| <b>TfCYP72A613</b> | <i>Trigonella foenum-graecum</i> | MK636708.1     | Steroid C27 hydroxylation         |
| <b>PpCYP72A616</b> | <i>Paris polyphylla</i>          | MK636705.1     | Steroid C27 hydroxylation         |
